# Supplementary material for: Time-resolved serial crystallography to track the dynamics of carbon monoxide in the active site of cytochrome c oxidase
Source: PubMed Central journal article supplement — Sci Adv. 2023 Dec 8;9(49):eadh4179. doi: 10.1126/sciadv.adh4179 (PMC10708180; doi:10.1126/sciadv.adh4179), 2023-12-08
Supplement: sciadv.adh4179_sm.pdf [file sciadv.adh4179_sm.pdf]

Supplementary Materials for  
**Time-resolved serial crystallography to track the dynamics of  
carbon monoxide in the active site of cytochrome *c* oxidase**

Cecilia Safari *et al.*

Corresponding author: Gisela Brändén, [gisela.branden@gu.se](mailto:gisela.branden@gu.se); Richard Neutze, [richard.neutze@gu.se](mailto:richard.neutze@gu.se)

*Sci. Adv.* **9**, eadh4179 (2023)  
DOI: 10.1126/sciadv.adh4179

**This PDF file includes:**

Fig. S1 to S4  
Table S1

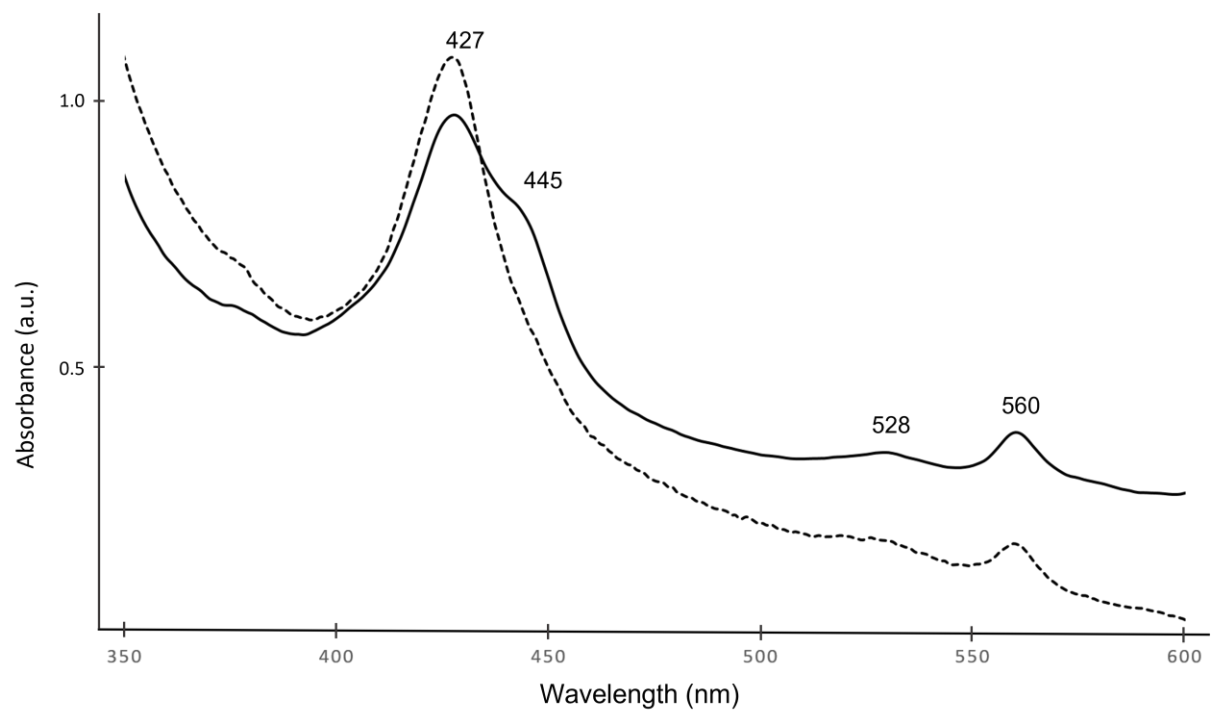

**Fig. S1.**

**Optical absorbance spectra of *ba*<sub>3</sub>-type CcO microcrystals in LCP.** The optical absorbance spectra of dithionite-reduced microcrystals (solid line) and reduced CO-bound microcrystals (dashed line).

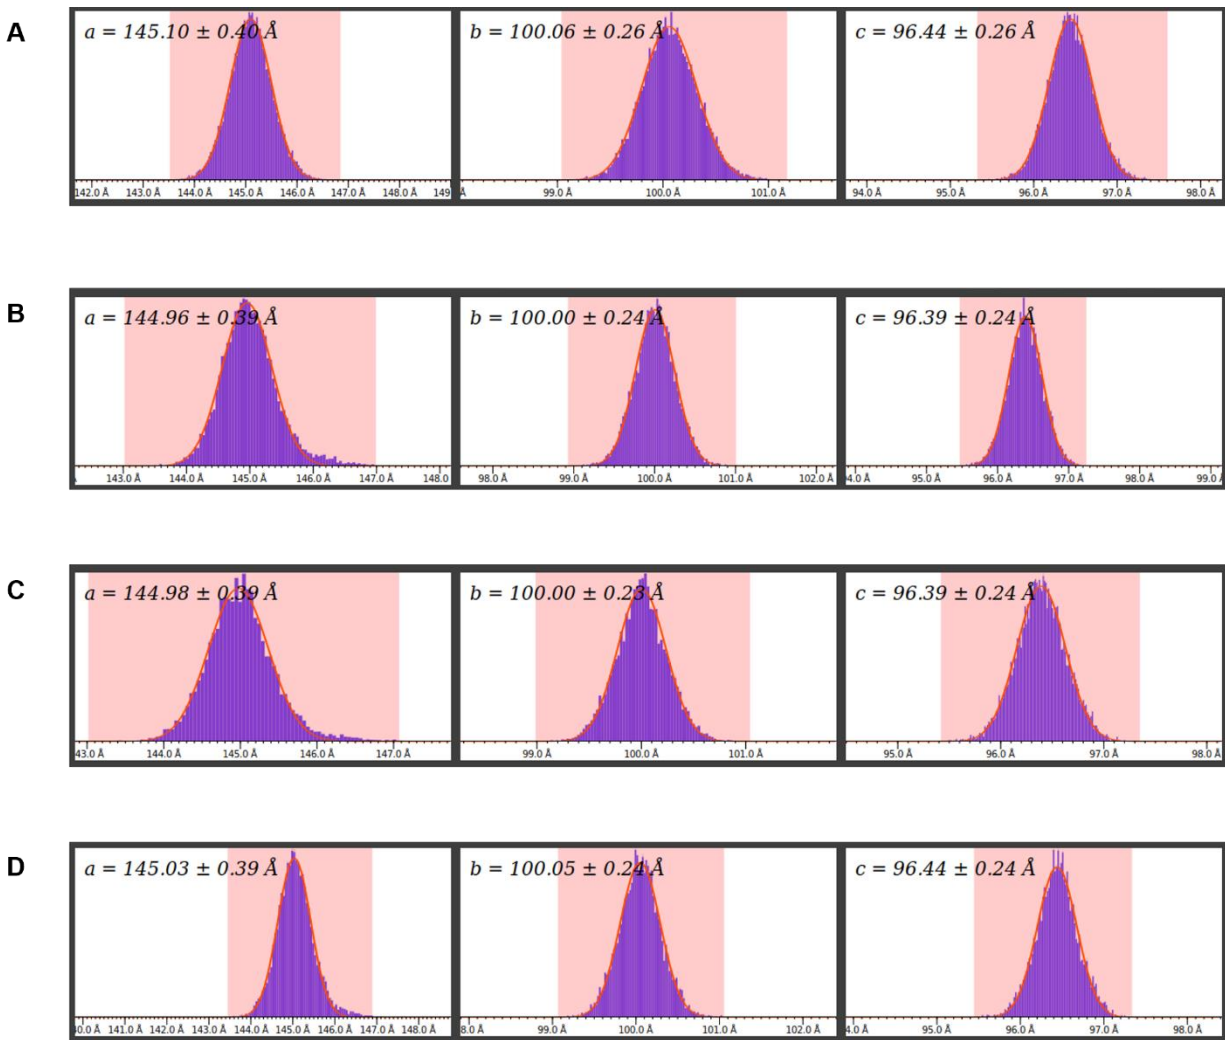

**Fig. S2.**

**Unit cell parameters of the light and dark data sets.** Unit cell parameters from indexing using CrystFEL are given for **(A)** the dark-only (collected without interleaved light images) data set, **(B)** the dark 1 (first exposure without laser illumination) data set, **(C)** the dark 2 (second exposure without laser illumination) data set, and **(D)** the light (laser illuminated) data set. The variation of the unit cell axis of the different data sets is much smaller than the estimated uncertainties.

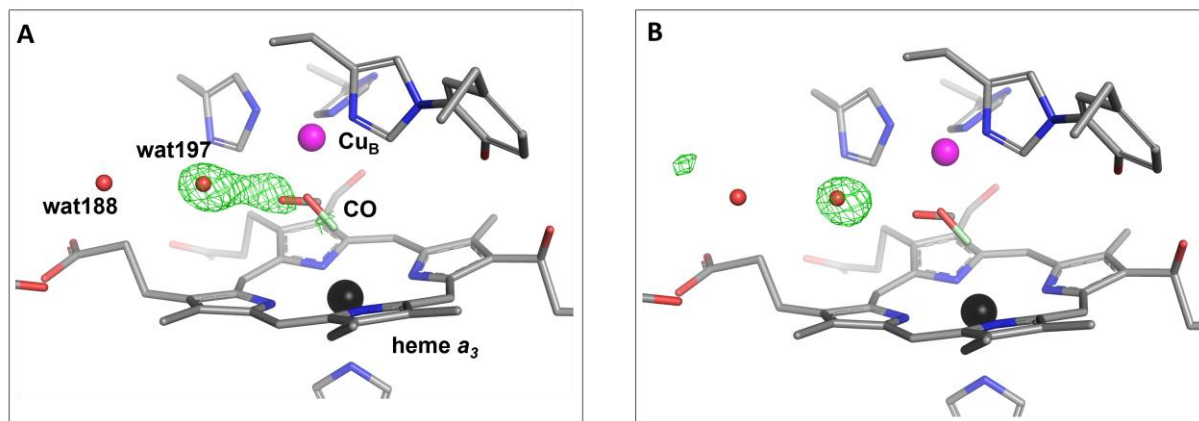

**Fig. S3.**

**Activated-state structure of *ba*<sub>3</sub>-type CcO from partial occupancy refinement.** (A) The positive  $F_o - F_c$  omit map density (green), calculated with CO in the dark state position at an occupancy of 70 % but without the activated state CO molecule or wat197 present in the model, is displayed at  $3.0 \sigma$  around the CO molecule. The CO molecule from the dark state structure (green) is included for comparison. (B) To highlight the position of the new water molecule, the positive  $F_o - F_c$  omit map density (green), calculated without wat197 in the model but with the CO molecule present in the two positions, is displayed at  $3.5 \sigma$ . The CO molecule from the dark state structure (green) is included for comparison.

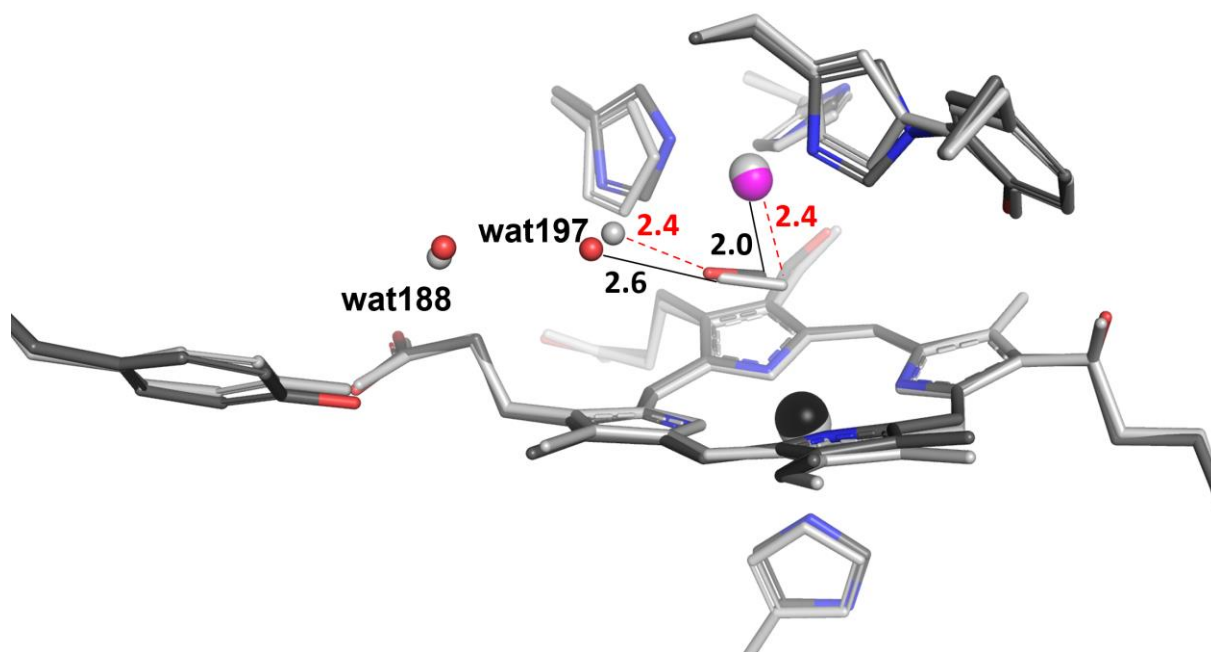

**Fig. S4.**

**Activated-state structure of *ba*<sub>3</sub>-type CcO.** Comparison between activated-state structure from partial occupancy refinement (protein dark grey, heme *a*<sub>3</sub> iron black, Cu<sub>B</sub> purple, water molecules red) with that based on extrapolated structure factors (light grey). Distances between the CO molecule and Cu<sub>B</sub> as well as the CO molecule and wat197 are indicated in black (structure from partial occupancy refinement) and red (structure refined using extrapolated structure factors), respectively.

**Table S1.**  
**X-ray diffraction data collection and refinement statistics.**

|                                                                                                                                                                           | Dark               | Activated state<br>partial occupancy<br>refinement | Activated state<br>Xtrapol8 refinement |
|---------------------------------------------------------------------------------------------------------------------------------------------------------------------------|--------------------|----------------------------------------------------|----------------------------------------|
| <b>PDB code</b>                                                                                                                                                           | 8K65               | 8AJZ                                               | 8K6Y                                   |
| <b>Data Collection</b>                                                                                                                                                    |                    |                                                    |                                        |
| Collection temperature (K)                                                                                                                                                | 293                | 293                                                | 293                                    |
| Space Group                                                                                                                                                               | C121               | C121                                               | C121                                   |
| Cell dimensions                                                                                                                                                           |                    |                                                    |                                        |
| a, b, c (Å)                                                                                                                                                               | 145.9, 100.3, 96.6 | 145.9, 100.3, 96.6                                 | 145.9 100.3, 96.6                      |
| α, β, γ (°)                                                                                                                                                               | 90, 126.8, 90      | 90, 126.8, 90                                      | 90 126.8 90                            |
| Resolution (Å)‡                                                                                                                                                           | 43.4 - 2.0         | 43.4 - 2.0                                         | 43.4 - 2.0                             |
| R <sub>split</sub> (%)†‡                                                                                                                                                  | 18.1 (79.0)        | 25.4 (73.1)                                        |                                        |
| I/σ(I)‡                                                                                                                                                                   | 5.4 (1.3)          | 4.0 (1.4)                                          | 3.7 (1.1)                              |
| CC(1/2)‡                                                                                                                                                                  | 95.0 (46.6)        | 90.8 (55.0)                                        |                                        |
| Completeness (%)                                                                                                                                                          | 100                | 100                                                | 100                                    |
| Multiplicity‡                                                                                                                                                             | 233.9 (81.0)       | 94.5 (65.7)                                        |                                        |
| Number of collected images                                                                                                                                                | 201274             | ~97500                                             | ~97500                                 |
| Number of hits                                                                                                                                                            | 41059              | 13096                                              | 13096                                  |
| Number of indexed patterns                                                                                                                                                | 26999              | 10844                                              | 10844                                  |
| Indexing rate (%)                                                                                                                                                         | 13.4               | ~11.1                                              | ~11.1                                  |
| Number of total reflections                                                                                                                                               | 17591236           | 7109569                                            | 7109569                                |
| Number of unique reflections                                                                                                                                              | 75223              | 75202                                              | 75202                                  |
| <b>Refinement</b>                                                                                                                                                         |                    |                                                    |                                        |
| Resolution                                                                                                                                                                | 37.2 - 2.0         | 38.7 - 2.0                                         | 37.2 - 2.0                             |
| R <sub>work</sub> / R <sub>free</sub> (%)                                                                                                                                 | 17.1 / 19.6        | 18.7 / 21.3                                        | 39.6 / 43.5                            |
| Number of atoms                                                                                                                                                           | 6493               | 6591                                               | 6474                                   |
| Average B factor (Å <sup>2</sup> )                                                                                                                                        | 37.8               | 43.7                                               | 37.0                                   |
| R.m.s deviations                                                                                                                                                          |                    |                                                    |                                        |
| Bond lengths (Å)                                                                                                                                                          | 0.016              | 0.016                                              | 0.010                                  |
| Bond angles (°)                                                                                                                                                           | 1.82               | 2.07                                               | 1.84                                   |
| †R <sub>split</sub> = $1/\sqrt{2} \frac{\sum hkl  I_{even}-I_{odd} }{1/2 \sum hkl  I_{even}+I_{odd} }$<br>‡Values in parenthesis is those of the highest resolution shell |                    |                                                    |                                        |
